# Supplementary material
Source: PubMed Central journal article supplement (PMC4021451)
Supplement: NIHMS58525-supplement-suppl_data.pdf [file NIHMS58525-supplement-suppl_data.pdf]

## SUPPORTING INFORMATION

Unsymmetric mono- and dinuclear platinum(IV)  
complexes featuring an ethylene glycol moiety:  
synthesis, characterization and biological activity

*Verena Pichler,<sup>†</sup> Petra Heffeter,<sup>‡,§</sup> Seied M. Valiahd,† Christian R. Kowol,<sup>†,§</sup> Alexander Egger,<sup>†</sup>  
Walter Berger,<sup>‡,§</sup> Michael A. Jakupec,<sup>†,§</sup> Markus Galanski<sup>\*,†</sup> and Bernhard K. Keppler<sup>\*,†,§</sup>*

<sup>†</sup> Institute of Inorganic Chemistry, University of Vienna, Waehringer Strasse 42, A-1090  
Vienna, Austria

<sup>‡</sup> Institute of Cancer Research and Comprehensive Cancer Center, Medical University of  
Vienna, Borschkegasse 8a, A-1090 Wien

<sup>§</sup> Research Platform “Translational Cancer Therapy Research” University of Vienna,  
Waehringer Strasse 42, A-1090 Vienna, Austria

## CONTENTS

- page S3: Table S1 with crystal data, data collecting parameters, and structure refinement details of **1b**<sup>+</sup>TFA<sup>-</sup>
- page S4: Table S2 with elemental analysis of novel platinum(IV) compounds
- page S5: Figure S1 with platinum(II) compounds in worldwide clinical application
- page S6: Figure S2 with reversed-phase HPLC chromatograms of log  $k_w$  measurements
- page S7-S9: Figures S3-S5 with concentration effect curves in the CH1, SW480 and A549 cell line.
- page S10: Figure S6 with IC<sub>50</sub> versus log  $k_w$  plots in cell lines CH1, A549 and SW480
- page S11: Figure S7 with NMR numbering scheme

**Table S1.** Crystal data, data collecting parameters, and structure refinement details of **1b<sup>+</sup>·TFA<sup>-</sup>**

| <b>1b<sup>+</sup>·TFA<sup>-</sup></b>       |                                                                                                |
|---------------------------------------------|------------------------------------------------------------------------------------------------|
| Empirical formula                           | C <sub>7</sub> H <sub>17</sub> Cl <sub>2</sub> F <sub>3</sub> N <sub>2</sub> O <sub>4</sub> Pt |
| Fw                                          | 516.22                                                                                         |
| Space group                                 | monoclinic, P-1                                                                                |
| <i>a</i> [Å]                                | 6.1836(2)                                                                                      |
| <i>b</i> [Å]                                | 8.0658(3)                                                                                      |
| <i>c</i> [Å]                                | 15.5374(7)                                                                                     |
| $\alpha$ [°]                                | 102.217(3)                                                                                     |
| $\beta$ [°]                                 | 92.750(3)                                                                                      |
| $\gamma$ [°]                                | 108.655(2)                                                                                     |
| <i>V</i> [Å <sup>3</sup> ]                  | 711.98(5)                                                                                      |
| <i>Z</i>                                    | 2                                                                                              |
| $\lambda$ [Å]                               | 0.71073                                                                                        |
| $\rho_{\text{calcd}}$ [g cm <sup>-3</sup> ] | 2.408                                                                                          |
| crystal size [mm <sup>3</sup> ]             | 0.20 x 0.20 x 0.08                                                                             |
| <i>T</i> [K]                                | 100(2)                                                                                         |
| $\mu$ [mm <sup>-1</sup> ]                   | 10.273                                                                                         |
| <i>R</i> <sub>1</sub> <sup>[a]</sup>        | 0.0228                                                                                         |
| <i>wR</i> <sub>2</sub> <sup>[b]</sup>       | 0.0548                                                                                         |
| GOF <sup>[c]</sup>                          | 1.067                                                                                          |

<sup>a</sup>  $R_1 = \sum ||F_o| - |F_c|| / \sum |F_o|$ . <sup>b</sup>  $wR_2 = \{\sum [w(F_o^2 - F_c^2)^2] / \sum [w(F_o^2)^2]\}^{1/2}$ . <sup>c</sup>  $\text{GOF} = \{\sum [w(F_o^2 - F_c^2)^2] / (n - p)\}^{1/2}$ , where *n* is the number of reflections and *p* is the total number of parameters refined.

**Table S2.** Elemental analysis of novel platinum(IV) compounds

|    |                                                                                                      |       |       |      |      |
|----|------------------------------------------------------------------------------------------------------|-------|-------|------|------|
| 1b | C <sub>5</sub> H <sub>16</sub> N <sub>2</sub> O <sub>2</sub> Cl <sub>2</sub> Pt                      | calcd | 14,93 | 4,01 | 6,97 |
|    |                                                                                                      | found | 14,73 | 3,73 | 6,69 |
| 1c | CH <sub>10</sub> Cl <sub>2</sub> N <sub>2</sub> O <sub>2</sub> Pt·0.5MeOH                            | calcd | 4,95  | 3,32 | 7,69 |
|    |                                                                                                      | found | 4,94  | 3,12 | 7,37 |
| 2b | C <sub>9</sub> H <sub>20</sub> Cl <sub>2</sub> N <sub>2</sub> O <sub>3</sub> Pt                      | calcd | 21,52 | 4,10 | 5,58 |
|    |                                                                                                      | found | 21,95 | 3,93 | 5,36 |
| 2c | C <sub>5</sub> H <sub>14</sub> Cl <sub>2</sub> N <sub>2</sub> O <sub>3</sub> Pt                      | calcd | 13,40 | 3,15 | 6,25 |
|    |                                                                                                      | found | 13,45 | 2,95 | 6,00 |
| 3b | C <sub>10</sub> H <sub>22</sub> Cl <sub>2</sub> N <sub>2</sub> O <sub>5</sub> Pt                     | calcd | 23,26 | 4,30 | 5,43 |
|    |                                                                                                      | found | 23,34 | 4,04 | 5,37 |
| 4a | C <sub>10</sub> H <sub>22</sub> Cl <sub>2</sub> N <sub>2</sub> O <sub>6</sub> Pt                     | calcd | 22,56 | 4,17 | 5,26 |
|    |                                                                                                      | found | 22,69 | 3,96 | 5,04 |
| 4b | C <sub>11</sub> H <sub>24</sub> Cl <sub>2</sub> N <sub>2</sub> O <sub>6</sub> Pt·0.5MeOH             | calcd | 24,56 | 4,66 | 4,98 |
|    |                                                                                                      | found | 24,80 | 4,40 | 4,67 |
| 4c | C <sub>7</sub> H <sub>18</sub> Cl <sub>2</sub> N <sub>2</sub> O <sub>6</sub> Pt                      | calcd | 17,08 | 3,69 | 5,69 |
|    |                                                                                                      | found | 17,08 | 3,45 | 5,91 |
| 5a | C <sub>18</sub> H <sub>38</sub> Cl <sub>4</sub> N <sub>4</sub> O <sub>10</sub> Pt <sub>2</sub> ·MeOH | calcd | 22,06 | 4,09 | 5,42 |
|    |                                                                                                      | found | 21,98 | 3,74 | 5,02 |
| 5b | C <sub>20</sub> H <sub>42</sub> Cl <sub>4</sub> N <sub>4</sub> O <sub>10</sub> Pt·EtOAc              | calcd | 24,96 | 4,55 | 5,06 |
|    |                                                                                                      | found | 24,70 | 4,48 | 5,09 |

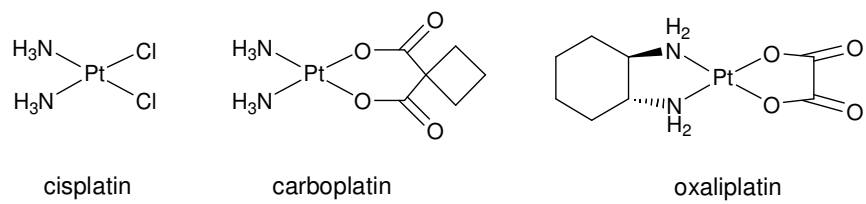

**Figure S1.** Platinum(II) compounds in worldwide clinical application

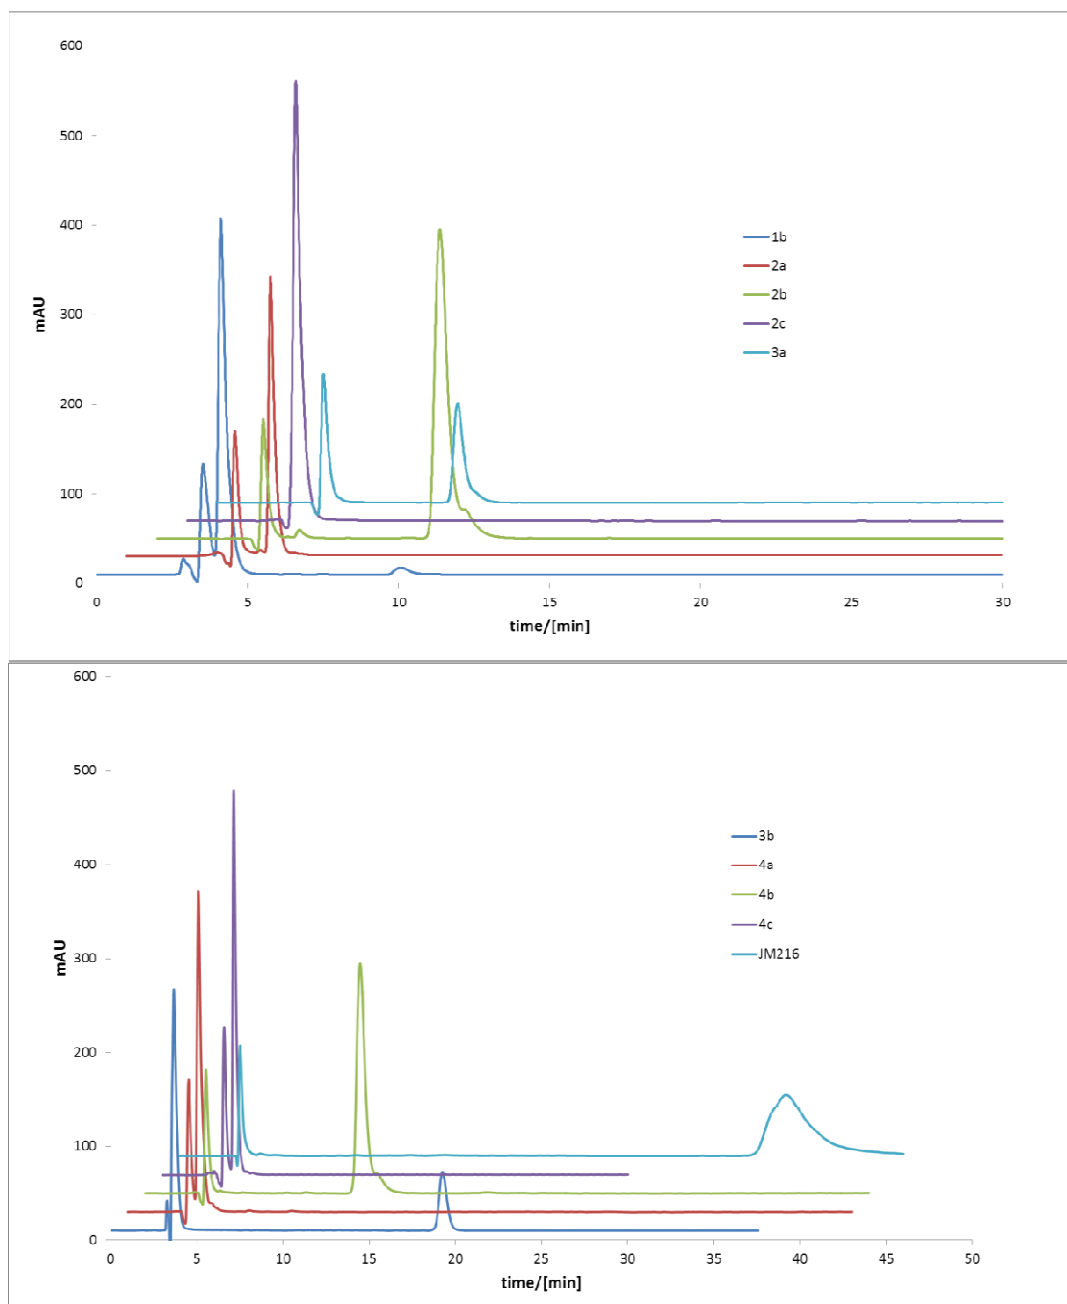

**Figure S2.** Reversed phase measurements in 20% MeOH/ 80% aqueous formic acid of all synthesized platinum(IV)-compounds, excluding the dimeric species (**5a** and **5b**), which expose retention times higher than 40 min under these conditions.

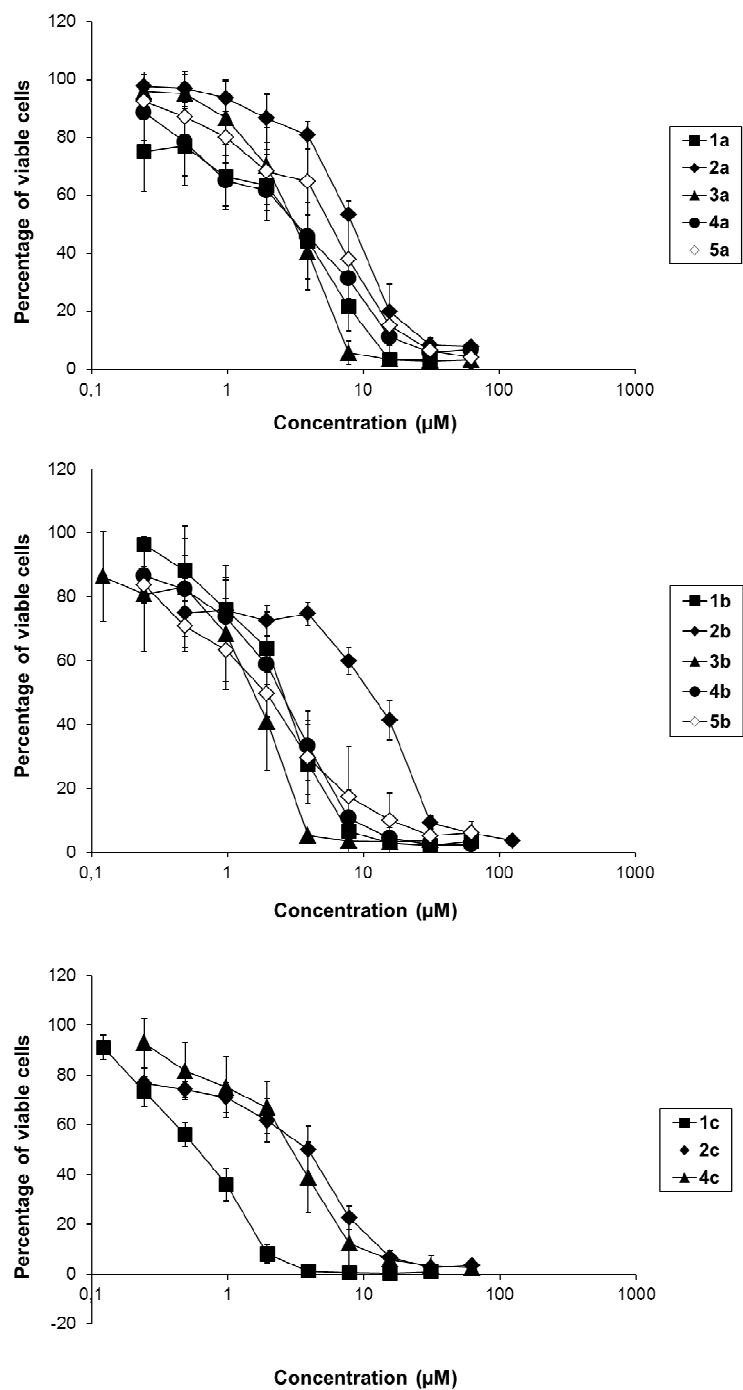

**Figure S3.** Concentration-effect curves in the CH1 cell line obtained by MTT assay (96 h exposure).

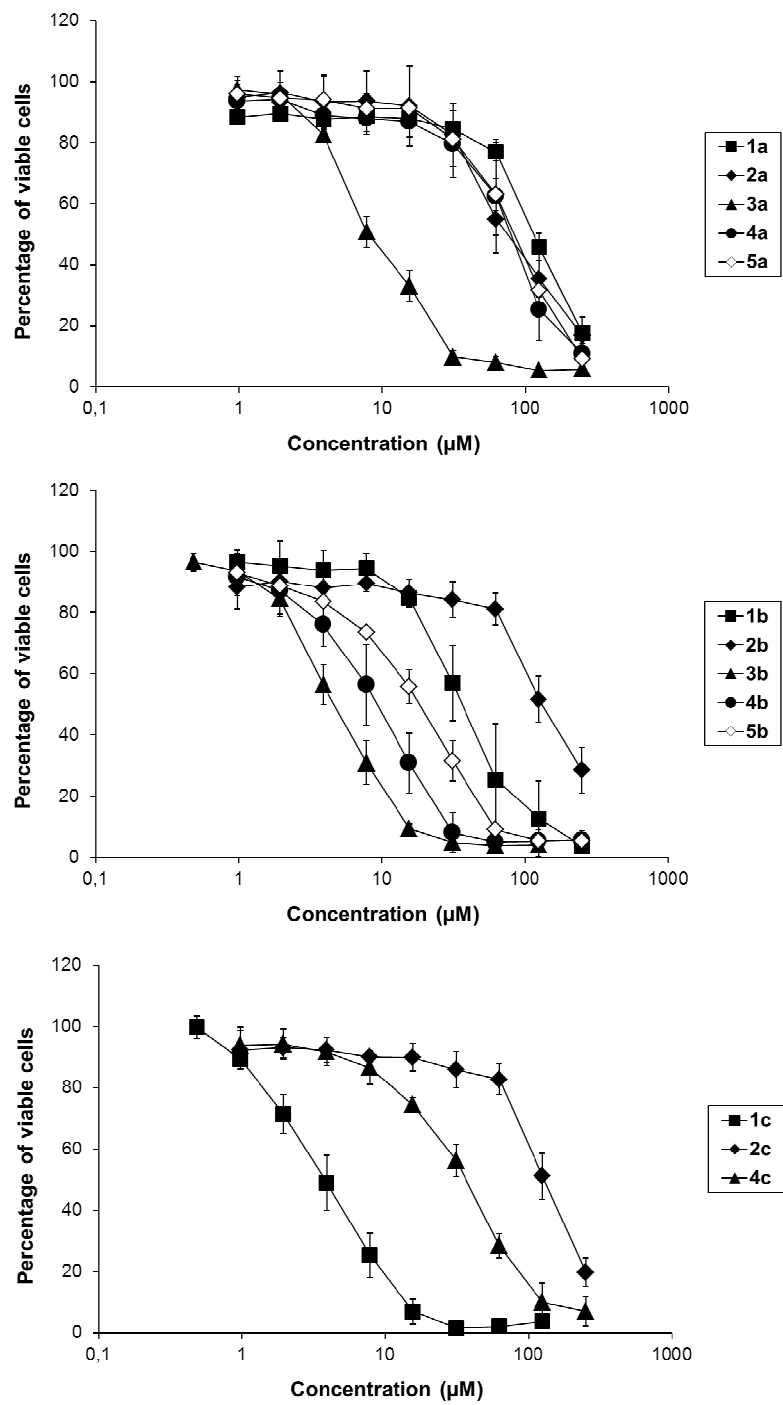

**Figure S4.** Concentration-effect curves in the SW480 cell line obtained by MTT assay (96 h exposure).



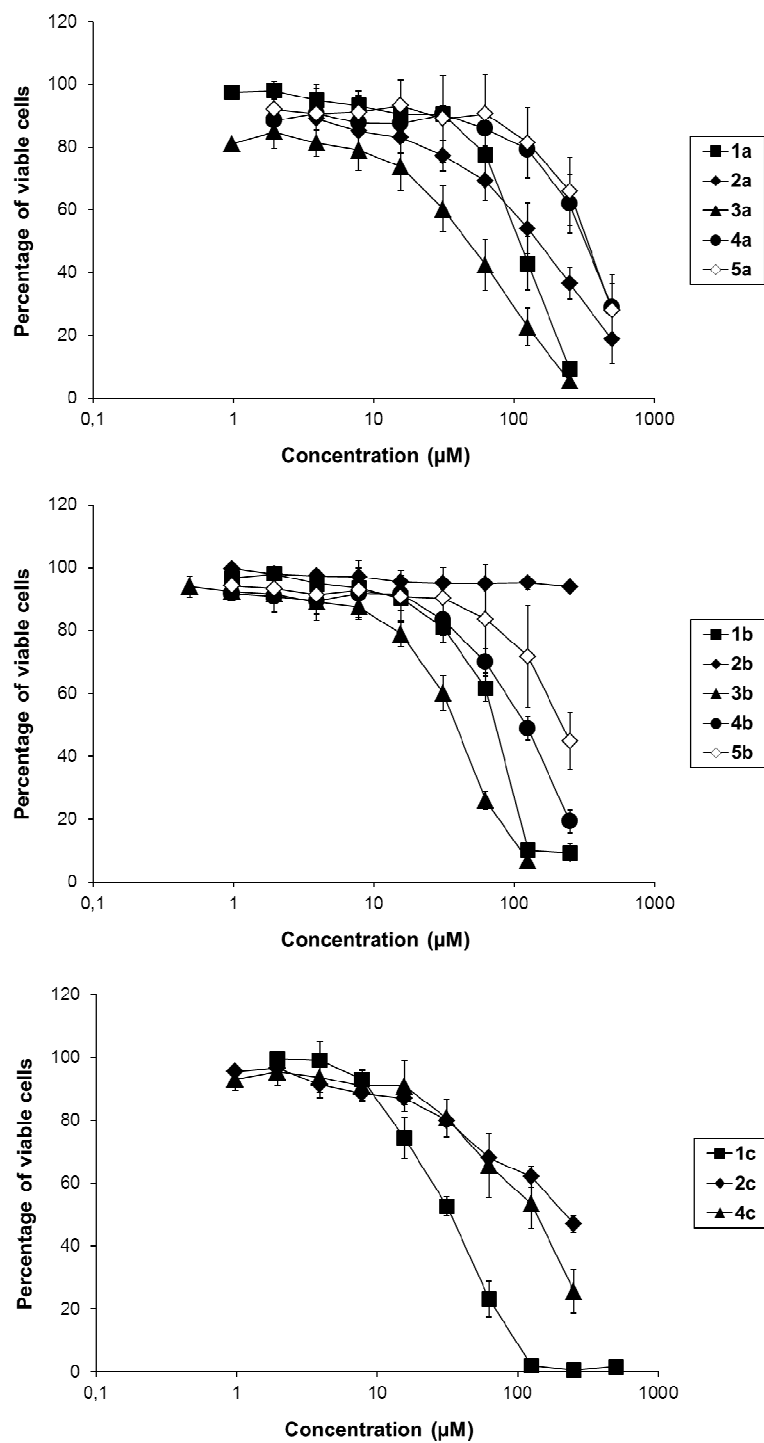

**Figure S5.** Concentration-effect curves in the A549 cell line obtained by MTT assay (96 h exposure).

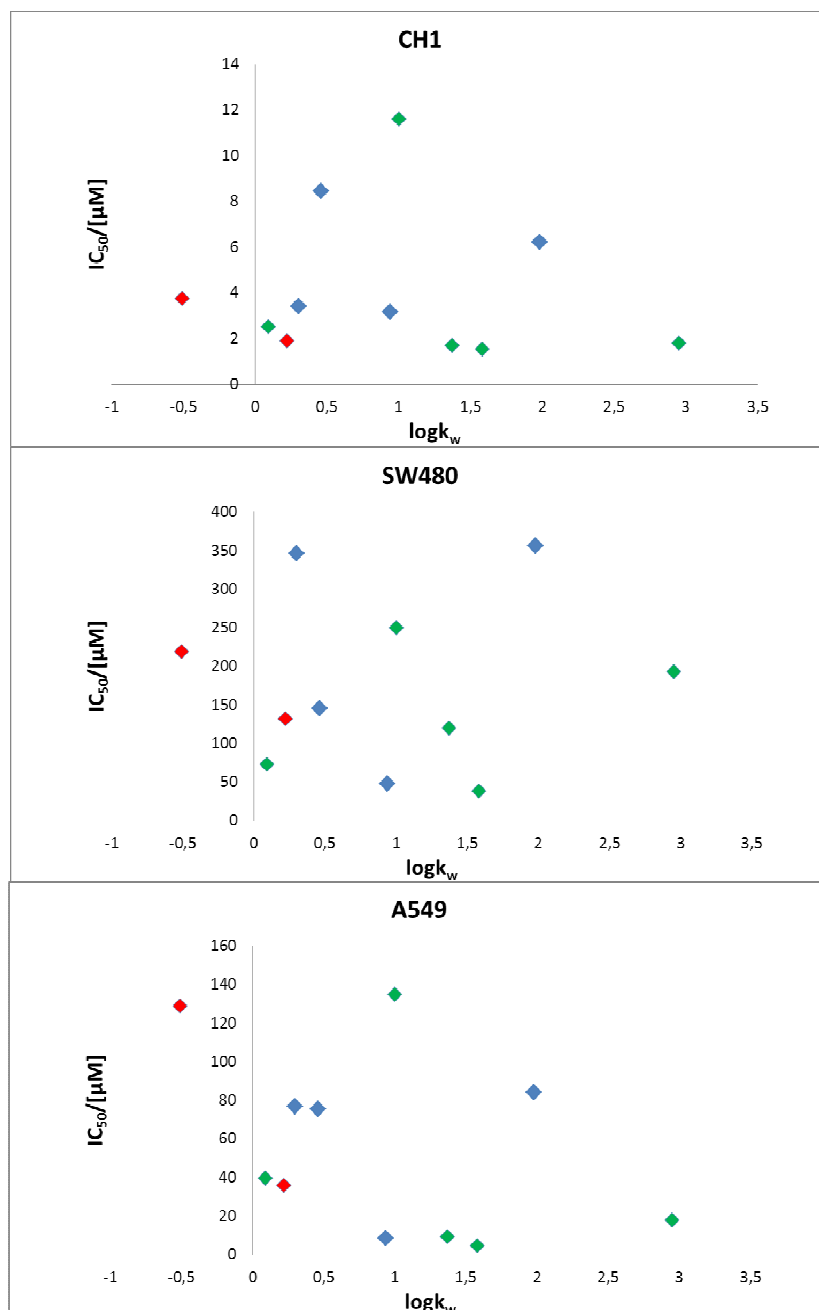

**Figure S6.** Correlation plots between the values  $\log k_w$  and cytotoxicity in three human cancer cell lines. The blue spots show the platinum compounds with the general formular  $Me_2enPtCl_2(OH)(R)$ , the green spots  $Me_2enPtCl_2(OMe)(R)$  and the red spots the complexes with the coordination sphere  $(NH_3)_2PtCl_2(OMe)(R)$ .

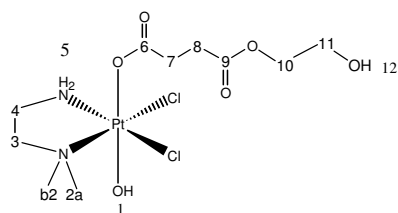

Compound **4a**

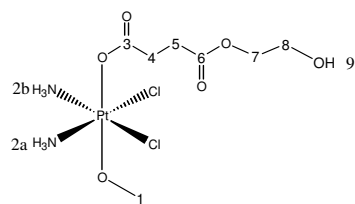

Compound **4c**

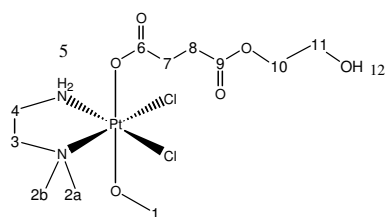

Compound **4b**

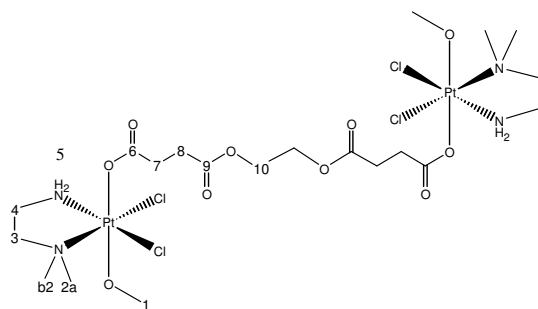

Compound **5b**

Figure S7. NMR-numbering scheme
